# Supplementary material
Source: PubMed Central journal article supplement (PMC4745884)
Supplement: NIHMS749263-supplement-1.pdf [file NIHMS749263-supplement-1.pdf]

## **Inventory of Supplemental Information**

### **Supplemental Data**

**Figure S1, related to Figure 1**

**Table S1, related to Figure 1**

**Table S2, related to Figure 1**

**Figure S2, related to Figure 2**

**Figure S3, related to Figure 3**

**Figure S4, related to Figure 4**

**Figure S5, related to Figure 5**

**Supplemental Experimental Procedures**
