# Supplementary material
Source: PubMed Central journal article supplement (PMC4745884)
Supplement: NIHMS749263-supplement-2.pdf [file NIHMS749263-supplement-2.pdf]

# Supplemental Data

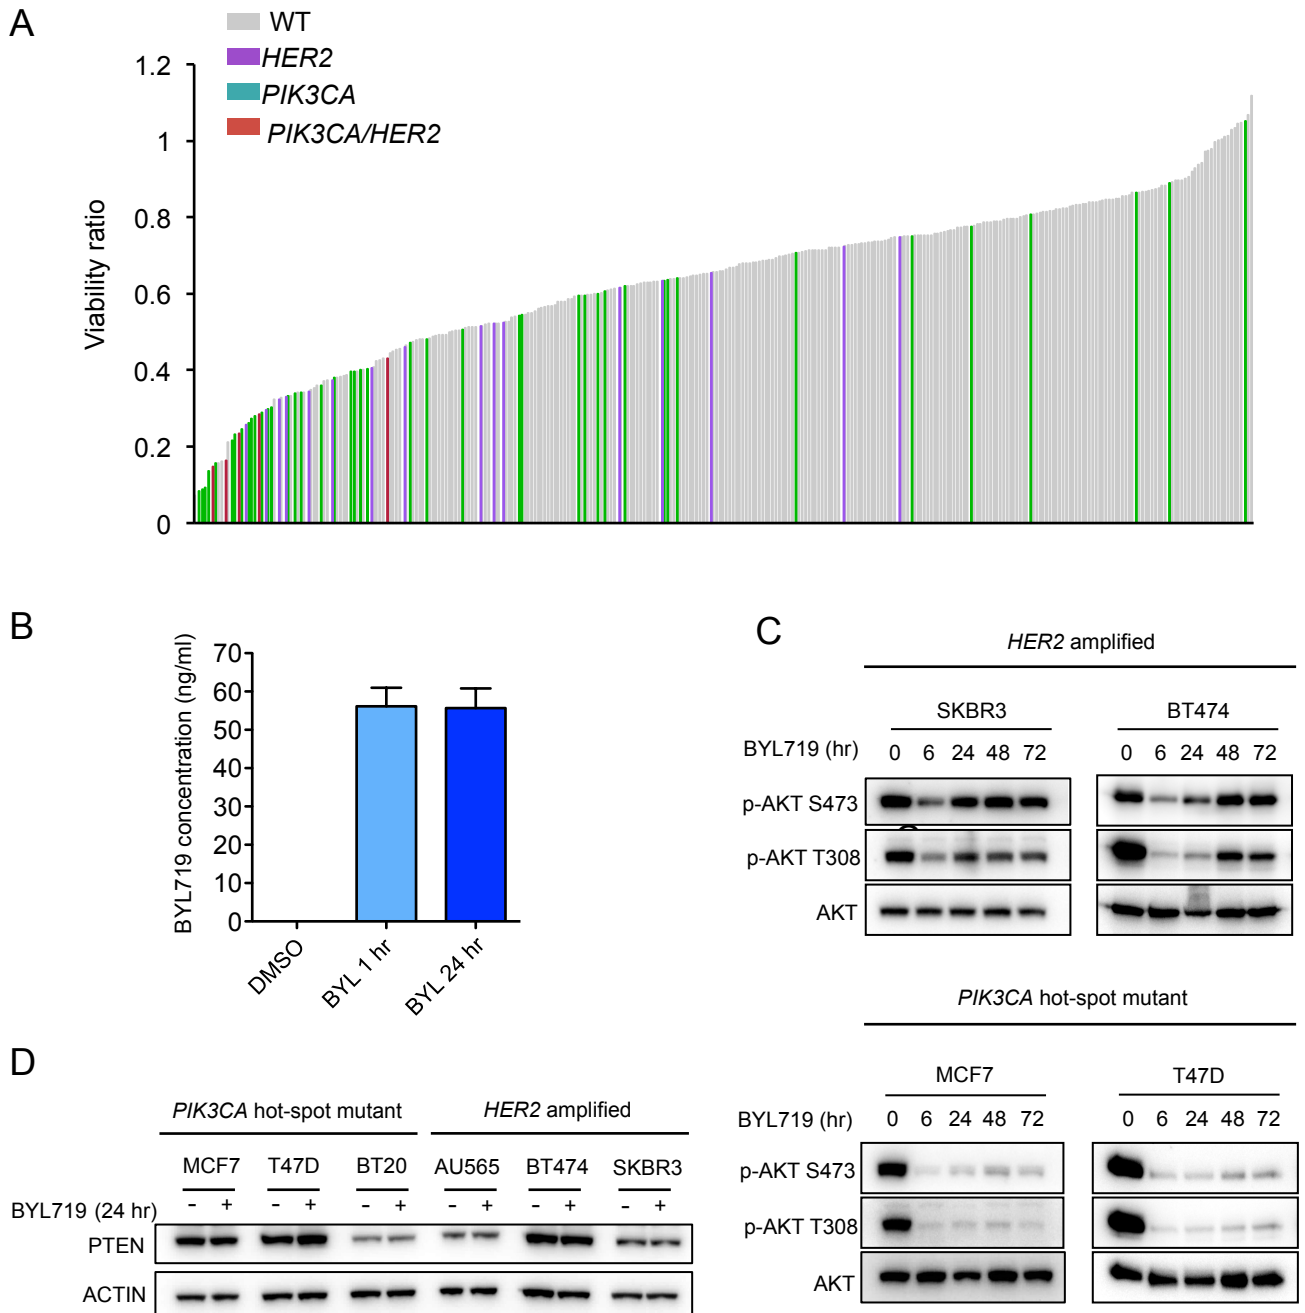

**Figure S1 (Related to Figure 1). Phospho-AKT signaling is restored only in *HER2* amplified breast cancer after 48 hours of treatment with BYL719.**

**(A)** Effects of BYL719 on proliferation of a panel of 321 cancer cell lines. *HER2* amplified versus *HER2* WT, Fishers test  $p=0.0002$ ; *PIK3CA* mutant versus *PIK3CA* WT, Fishers test  $p<0.0001$ .

**(B)** BT474 cells were harvested following treatment with 1  $\mu$ M BYL719 for the indicated periods of time and the intracellular concentration of BYL719 was measured. Each data point is the average  $\pm$  SEM.

**(C, D)** The indicated cell lines were treated with 1  $\mu$ M BYL719 for the different periods of time. Lysates were immunoblotted to detect the indicated proteins.

Table S1 (Related to Figure 1)

| Cell Line      | Viability ratio |
|----------------|-----------------|
| MCF7           | 0.0837          |
| HCC1954        | 0.1483          |
| MDA-MB-453     | 0.1638          |
| KPL-1          | 0.2168          |
| EFM-19         | 0.2454          |
| T47D           | 0.2628          |
| UACC-893       | 0.2839          |
| ZR-75-30       | 0.2963          |
| SK-BR-3        | 0.3309          |
| CAL-51         | 0.3606          |
| JIMT-1         | 0.3734          |
| MDA-MB-175-VII | 0.4021          |
| EFM-192A       | 0.4057          |
| HCC202         | 0.4314          |
| AU565          | 0.4602          |
| HCC1419        | 0.5224          |
| CAL-85-1       | 0.5789          |
| ZR-75-1        | 0.6161          |
| BT-549         | 0.6298          |
| HCC1569        | 0.6342          |
| Hs 578T        | 0.6785          |
| MDA-MB-134-VI  | 0.7123          |
| BT-483         | 0.7144          |
| CAL-120        | 0.7519          |
| HCC70          | 0.7595          |
| HCC1395        | 0.782           |
| MDA-MB-415     | 0.7864          |
| HCC1143        | 0.7869          |
| MDA-MB-157     | 0.7966          |
| MDA-MB-436     | 0.8399          |
| MDA-MB-231     | 0.8493          |
| HCC1937        | 0.8578          |
| BT-20          | 0.8645          |
| HCC1806        | 0.8922          |
| MDA-MB-468     | 1.0041          |
| CAMA-1         | 1.0445          |

Cell lines included in the screening presented in Figure 1A

Table S2 (Related to Figure 1)

| Cell Line      | Viability ratio | Cell Line (2) | Viability ratio (2) | Cell Line (3) | Viability ratio (3) | Cell Line (4) | Viability ratio (4) | Cell Line (5) | Viability ratio (5) |
|----------------|-----------------|---------------|---------------------|---------------|---------------------|---------------|---------------------|---------------|---------------------|
| DOK            | 0.0717          | FaDu          | 0.4925              | MEWO          | 0.6472              | 647-V         | 0.7639              | SiHa          | 0.9367              |
| MCF7           | 0.0837          | SKG-IIIa      | 0.4966              | HuH-7         | 0.6493              | NCI-H520      | 0.7663              | NCI-H2347     | 0.9428              |
| ME-180         | 0.0873          | RD            | 0.5019              | NUGC-3        | 0.6513              | CAL-62        | 0.7669              | NCI-H810      | 0.9716              |
| OAW42          | 0.0924          | COLO 205      | 0.5032              | MFE-296       | 0.6521              | CFPAC-1       | 0.7728              | CAL-54        | 0.9736              |
| HGC-27         | 0.1373          | COR-L23       | 0.5032              | OE33          | 0.6555              | CAL-72        | 0.7739              | NCI-H1693     | 0.978               |
| HCC1954        | 0.1483          | NCC-IT-A3     | 0.5069              | CHL-1         | 0.6569              | RPMI-7951     | 0.7743              | NCI-H1581     | 0.997               |
| CAL-33         | 0.1565          | MHH-ES-1      | 0.5116              | NCI-H1651     | 0.6575              | RT4           | 0.7746              | C3A           | 1.0014              |
| NB69           | 0.1572          | HT55          | 0.5118              | TYK-nu        | 0.6584              | J82           | 0.7762              | MDA-MB-468    | 1.0041              |
| AN3CA          | 0.1614          | SCC-25        | 0.5119              | COLO 741      | 0.6597              | HOS           | 0.7778              | C-4 II        | 1.0115              |
| MDA-MB-453     | 0.1638          | AsPC-1        | 0.5136              | HT-3          | 0.6633              | NCI-H1573     | 0.7812              | HMVII         | 1.0135              |
| A2780          | 0.212           | OE19          | 0.5151              | ABC-1         | 0.6688              | HCC1395       | 0.782               | SW 1116       | 1.0291              |
| KPL-1          | 0.2168          | BHT-101       | 0.5151              | Calu-1        | 0.669               | MDA-MB-415    | 0.7864              | PFSK-1        | 1.0328              |
| HSC-2          | 0.2316          | SNU-449       | 0.5203              | BFTC-905      | 0.6704              | HCC1143       | 0.7869              | CAMA-1        | 1.0445              |
| SK-OV-3        | 0.2342          | CaR-1         | 0.5223              | KYSE-140      | 0.6767              | WM-115        | 0.7876              | SW 1990       | 1.0466              |
| EFM-19         | 0.2454          | HCC1419       | 0.5224              | Hs 578T       | 0.6785              | NCI-H441      | 0.7884              | NCI-H2342     | 1.0523              |
| KYSE-410       | 0.2565          | H4            | 0.5229              | SK-N-AS       | 0.6799              | LN-405        | 0.7886              | U-251 MG      | 1.068               |
| T47D           | 0.2628          | OVCA9-5       | 0.5231              | G-361         | 0.6801              | PC-14         | 0.7887              | PC-3          | 1.1173              |
| MKN1           | 0.2737          | NCI-H2170     | 0.525               | RO82-W-1      | 0.6814              | SW-1710       | 0.7934              |               |                     |
| MFE-280        | 0.2809          | KOSC-2 cl3-43 | 0.5266              | NCI-H2291     | 0.6829              | NCI-H1650     | 0.7951              |               |                     |
| UACC-893       | 0.2839          | NCI-H358      | 0.5277              | NCI-H1648     | 0.6845              | COLO-680N     | 0.796               |               |                     |
| NCI-H596       | 0.2883          | MG-63         | 0.5375              | CAL-39        | 0.6868              | DoTc2 4510    | 0.7965              |               |                     |
| ZR-75-30       | 0.2963          | HUP-T4        | 0.5406              | SNU-387       | 0.6873              | MDA-MB-157    | 0.7966              |               |                     |
| AGS            | 0.2989          | TCCSUP        | 0.5417              | NCI-H1755     | 0.688               | NCI-H727      | 0.8003              |               |                     |
| LU99A          | 0.3028          | KYSE-510      | 0.5446              | 769-P         | 0.6893              | CCF-STTG1     | 0.8036              |               |                     |
| ChaGo-K-1      | 0.3225          | Capan-2       | 0.5455              | COLO-678      | 0.69275             | SW 1417       | 0.8061              |               |                     |
| NCI-N87        | 0.3242          | NCI-H838      | 0.5495              | M-14          | 0.6979              | C-33 A        | 0.8064              |               |                     |
| SW 48          | 0.3289          | NCI-H1666     | 0.5499              | SW 1463       | 0.6987              | NCI-H2030     | 0.8066              |               |                     |
| SK-BR-3        | 0.3309          | SW 780        | 0.5532              | SK-LU-1       | 0.7                 | HLE           | 0.8108              |               |                     |
| GP5d           | 0.3318          | Panc 10.05    | 0.56                | A431          | 0.7013              | PA-1          | 0.811               |               |                     |
| KYSE-180       | 0.3334          | SK-MES-1      | 0.5623              | MEL-HO        | 0.7043              | NCI-H661      | 0.8138              |               |                     |
| SW 1573        | 0.3395          | RMG-I         | 0.5656              | HT-1197       | 0.7066              | HUP-T3        | 0.8139              |               |                     |
| NCI-H23        | 0.3411          | NCI-H2009     | 0.5681              | VM-CUB1       | 0.7079              | SHP-77        | 0.8167              |               |                     |
| HT-29          | 0.3423          | BxPC-3        | 0.5683              | HO-1-N-1      | 0.7102              | EGI-1         | 0.8174              |               |                     |
| A-204          | 0.3425          | NCI-H630      | 0.5706              | MDA-MB-134-VI | 0.7123              | Panc 08.13    | 0.8216              |               |                     |
| Calu-3         | 0.3441          | CAL-85-1      | 0.5789              | B-CPAP        | 0.7128              | A-427         | 0.822               |               |                     |
| NCI-H1703      | 0.3479          | SAS           | 0.5795              | SW837         | 0.7131              | Saos-2        | 0.8231              |               |                     |
| DV-90          | 0.3532          | COLO-679      | 0.58                | SW 13         | 0.7133              | ACHN          | 0.8238              |               |                     |
| HuO9           | 0.3593          | HN            | 0.586               | BT-483        | 0.7144              | U-2 OS        | 0.8273              |               |                     |
| CAL-51         | 0.3606          | 5637          | 0.5863              | SW620         | 0.7145              | 786-O         | 0.8303              |               |                     |
| IGROV-1        | 0.3722          | MES-SA        | 0.5937              | SK-MEL-30     | 0.7148              | BHY           | 0.8326              |               |                     |
| SCC-9          | 0.3729          | Ca Ski        | 0.5948              | HSC-4         | 0.7198              | SK-HEP-1      | 0.8327              |               |                     |
| JIMT-1         | 0.3734          | SK-CO-1       | 0.595               | NCI-H1793     | 0.7199              | Panc 03.27    | 0.8346              |               |                     |
| KYSE-70        | 0.3799          | HEC-1         | 0.5957              | Ca9-22        | 0.72                | NCI-H2452     | 0.8353              |               |                     |
| Lu-135         | 0.3812          | GMS-10        | 0.5971              | T98G          | 0.7205              | KP-4          | 0.8384              |               |                     |
| NCI-H1623      | 0.3818          | DMS 273       | 0.5973              | OVCA9-8       | 0.7227              | IGR-1         | 0.839               |               |                     |
| BPH-1          | 0.3841          | HPAF-II       | 0.5989              | SW 1783       | 0.7257              | MDA-MB-436    | 0.8399              |               |                     |
| CHP-212        | 0.3864          | ESS-1         | 0.6007              | RPMI 2650     | 0.7271              | SW 626        | 0.8416              |               |                     |
| Detroit 562    | 0.3954          | HuCCCT1       | 0.6019              | T24           | 0.7285              | UACC-62       | 0.8434              |               |                     |
| HCT-15         | 0.3955          | 22RV1         | 0.6054              | A673          | 0.7293              | LoVo          | 0.8467              |               |                     |
| RT-112         | 0.3963          | NCI-H1792     | 0.6098              | OAW28         | 0.7301              | SW756         | 0.847               |               |                     |
| T84            | 0.4019          | NIH:OVCA9-3   | 0.6111              | SNU-423       | 0.7314              | RVH-421       | 0.847               |               |                     |
| MDA-MB-175-VII | 0.4021          | IPC-298       | 0.6122              | HT 1376       | 0.7321              | MIA PaCa-2    | 0.8492              |               |                     |
| SW-948         | 0.4035          | MKN7          | 0.6157              | UM-UC-3       | 0.7336              | MDA-MB-231    | 0.8493              |               |                     |
| EFM-192A       | 0.4057          | ZR-75-1       | 0.6161              | SN-12C        | 0.7345              | HSC-3         | 0.8548              |               |                     |
| G-401          | 0.4085          | NCI-H1048     | 0.6193              | NCI-H2087     | 0.7355              | A-375         | 0.8548              |               |                     |
| A549           | 0.4229          | CAL-12T       | 0.6201              | YKG-1         | 0.7362              | HCC1937       | 0.8578              |               |                     |
| H292           | 0.4254          | GCT           | 0.6205              | CAL 27        | 0.7371              | Capan-1       | 0.8639              |               |                     |
| COLO 792       | 0.4308          | NCI-H2122     | 0.621               | FTC-133       | 0.7396              | BT-20         | 0.8645              |               |                     |
| HCC202         | 0.4314          | H28           | 0.6238              | EFO-21        | 0.7402              | H2052         | 0.8648              |               |                     |
| SJCRH30        | 0.4446          | U-118 MG      | 0.6262              | SW 1088       | 0.7447              | C2BBe1        | 0.867               |               |                     |
| 23132/87       | 0.4488          | Daoy          | 0.6283              | PLC/PRF/5     | 0.747               | EFO-27        | 0.8672              |               |                     |
| NCI-H1993      | 0.4532          | BT-549        | 0.6298              | NCI/ADR-RES   | 0.7475              | KU-19-19      | 0.869               |               |                     |
| KYSE-150       | 0.4559          | Caov-4        | 0.6301              | SNU-475       | 0.7475              | NY            | 0.872               |               |                     |
| AU565          | 0.4602          | KYSE-520      | 0.6311              | COR-L 105     | 0.75                | BC-5          | 0.8739              |               |                     |
| NCI-H2405      | 0.4655          | MC-IXC        | 0.6317              | DU 145        | 0.7506              | DBTRG-05MG    | 0.8765              |               |                     |
| LS174T         | 0.4725          | HCC1569       | 0.6342              | 639-V         | 0.751               | HT 1080       | 0.8825              |               |                     |
| 8305C          | 0.4742          | BFTC-909      | 0.6345              | NCI-H1299     | 0.7518              | A2058         | 0.8831              |               |                     |
| NCI-H2228      | 0.4795          | HCT 116       | 0.6371              | CAL-120       | 0.7519              | SNG-M         | 0.8902              |               |                     |
| NCI-H1734      | 0.4798          | KYSE-450      | 0.6374              | KYSE-270      | 0.7523              | HCC1806       | 0.8922              |               |                     |
| SW 900         | 0.4803          | UO-31         | 0.6374              | EFE-184       | 0.7524              | A172          | 0.8953              |               |                     |
| NCI-H460       | 0.4806          | DK-MG         | 0.6402              | Caki-1        | 0.7533              | HTC-C3        | 0.8965              |               |                     |
| G-402          | 0.483           | SCC-4         | 0.6406              | SK-MEL-28     | 0.7536              | S-117         | 0.8967              |               |                     |
| NCI-H1437      | 0.4873          | HuO-3N1       | 0.6413              | VMRC-RCZ      | 0.7566              | SF-295        | 0.9008              |               |                     |
| LK-2           | 0.4909          | GAMG          | 0.6432              | NCI-H650      | 0.7569              | M059J         | 0.9055              |               |                     |
| LCLC-103H      | 0.4914          | NCI-H522      | 0.6463              | HCC70         | 0.7595              | UMC-11        | 0.92                |               |                     |
| MKN45          | 0.4915          | MEL-JUSO      | 0.647               | MKN28         | 0.761               | DMS 53        | 0.9293              |               |                     |

Cell lines included in the screening presented in Figure S1A

A

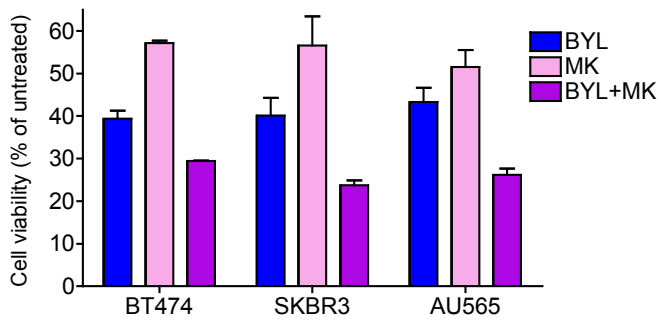

B

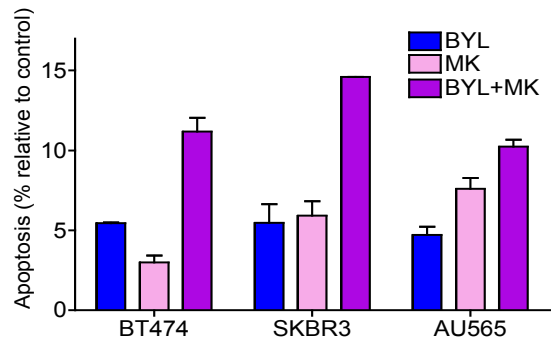

**Figure S2 (Related to Figure 2). Rebound of AKT signaling controls cell survival and proliferation in *HER2* amplified cells.**

**(A)** Cells were treated with 1  $\mu$ M BYL719, 156 nM MK2206 or the combination for 3 days, and cell viability was determined by CellTiter-Glo.

**(B)** Cells were treated with 1  $\mu$ M BYL719, 1  $\mu$ M MK2206 or the combination for 72 hr. The percentage of cells undergoing apoptosis, as measured by annexin V positivity, is shown relative to control cells.

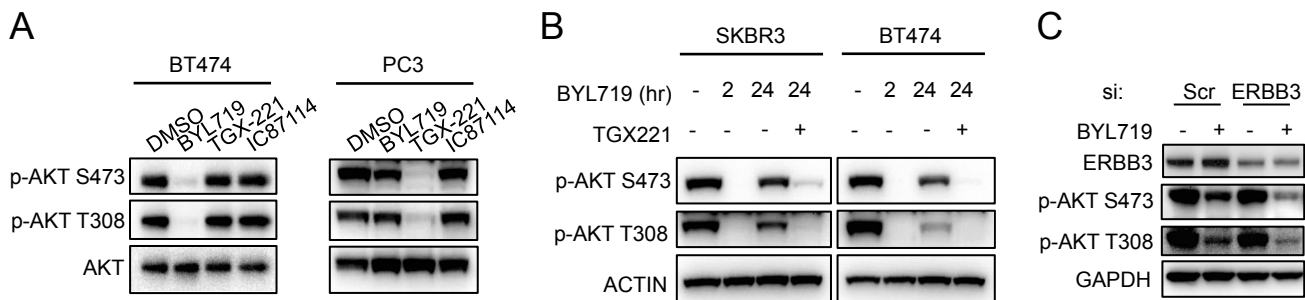

**Figure S3 (Related to Figure 3). Feedback activation of AKT following BYL719 is triggered by p110 $\beta$ .**

**(A)** The indicated cells were treated with p110 $\alpha$  inhibitor BYL719 (1  $\mu$ M), p110 $\beta$  inhibitor TGX-221 (1  $\mu$ M) and p110 $\delta$  inhibitor IC87114 (1  $\mu$ M) for 6 hr. Lysates were immunoblotted to detect the indicated proteins.

**(B)** The indicated cell lines were treated with 1  $\mu$ M TGX-221 for 9 hr following 24 hr treatment with 1  $\mu$ M BYL719. Lysates were immunoblotted to detect the indicated proteins.

**(C)** SKBR3 cells were transfected with control (Scr) or ERBB3-targeted siRNA for 48 hr, followed by treatment with 1  $\mu$ M BYL719 for an additional 24 hr. Lysates were immunoblotted to detect the indicated proteins.

A

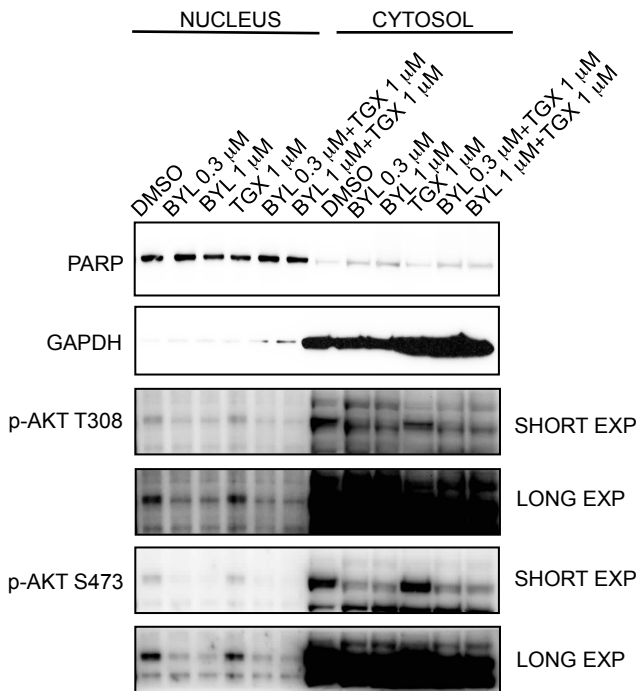

B

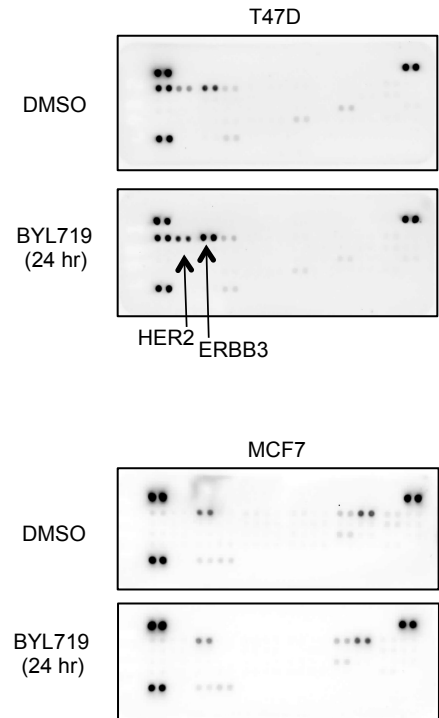

C

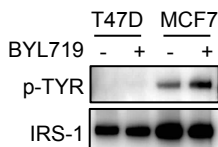

**Figure S4 (Related to Figure 4). BYL719 treatment induces activation of different RTKs in *PIK3CA* mutant cells.**

(A) MCF7 cells were treated with the indicated drug(s) for 24 hr. Equal amounts of cytoplasmic, and nuclear protein fractions were immunoblotted to detect the indicated proteins.

(B) Cells were treated as indicated with DMSO control or 1  $\mu$ M BYL719 for 24 hr. Cell lysates were prepared and incubated with pRTK arrays (R&D Biosystems). Arrows indicate RTKs whose phosphorylation was increased upon treatment with BYL719.

(C) Cells were treated for 24 hr with 1  $\mu$ M BYL719 and lysates were immunoprecipitated with IRS1 antibody. Immunoprecipitates were analyzed by Western blot analyses to detect the indicated antibodies.

**A**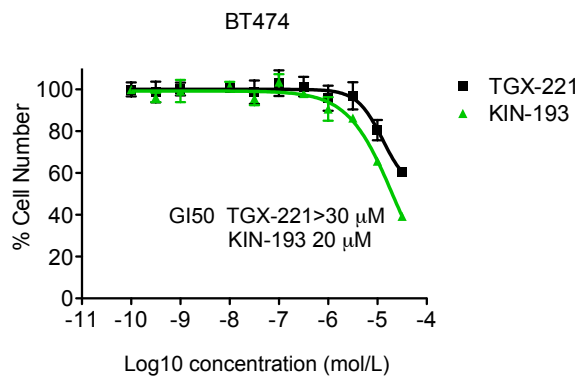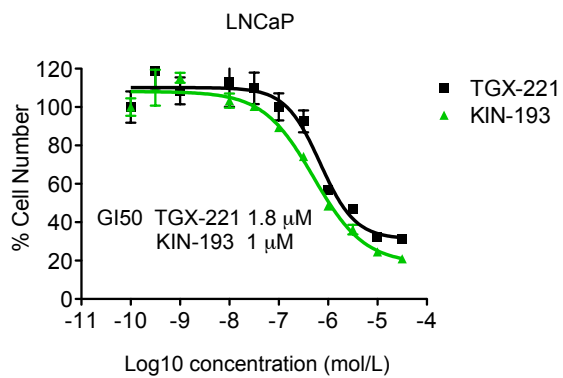**B**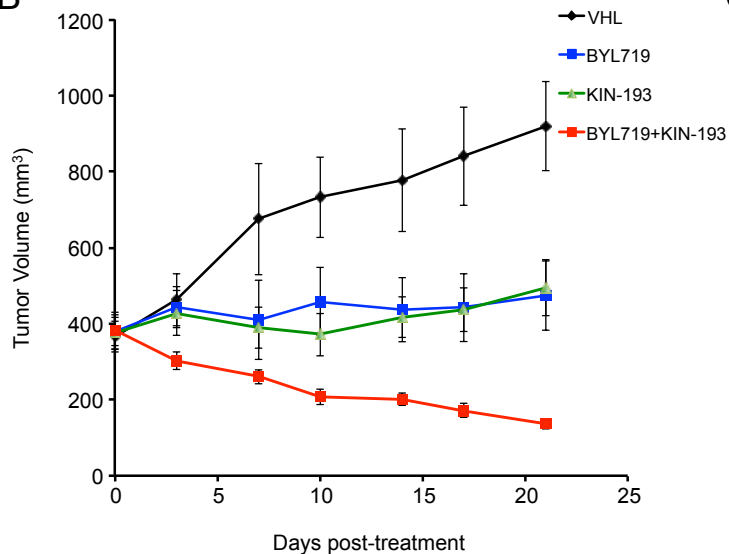**C**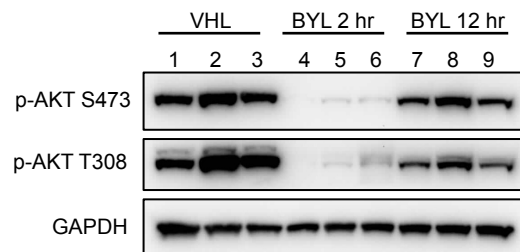**D**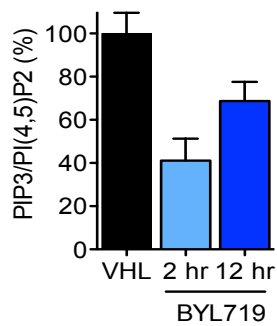**E**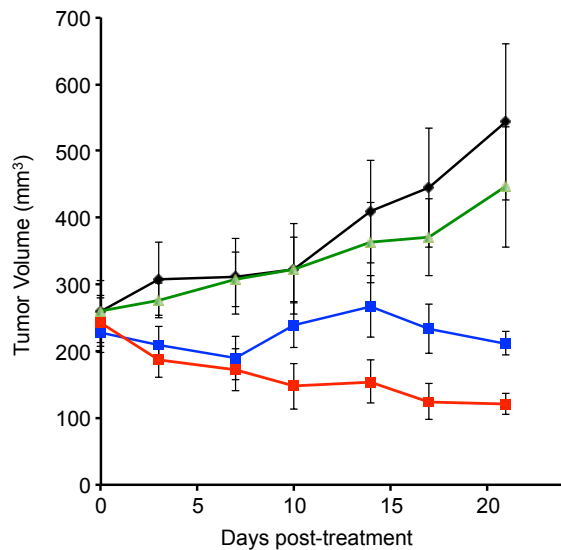

**Figure S5 (Related to Figure 5). In vivo rebound of PIP<sub>3</sub> and phospho-AKT after BYL719 treatment in *HER2* amplified tumors.**

**(A)** The indicated cell lines were treated with the increasing doses of TGX-221 or KIN-193 for 72 hr. Cell viability was measured in sextuplicate using CellTiter-Glo.

**(B)** BT474 cells were grown as xenograft tumors in Nu/Nu mice, and, when tumors were approximately 400 mm<sup>3</sup>, mice were randomized into treatment cohorts that received vehicle (VHL), BYL719 (BYL) 25 mg/kg per oral gavage daily, KIN-193 (KIN) 20 mg/kg per IP injection twice daily, and the combination. Tumor measurements were performed two times per week, and the average tumor volume for each cohort is displayed. BYL719 versus BYL719+KIN-193  $p < 0.05$  by t student test.

**(C)** Mice harboring BT474 tumors were administered with vehicle (VHL), BYL719 (BYL) 25 mg/kg per oral gavage daily for 3 days. Mice were sacrificed 2 and 12 hr after the last treatment. Lysates were prepared and blotted with the indicated antibodies.

**(D)** Phospholipids were isolated from tumors treated as in (C) and PIP<sub>3</sub> and PI(4,5)P<sub>2</sub> levels were quantified by ELISA.

**(E)** MCF7 cells were grown as xenograft tumors in Nu/Nu mice. When tumors were approximately 250 mm<sup>3</sup>, mice were randomized into treatment cohorts and monitored as described in (B). BYL719 versus BYL719+KIN-193  $p < 0.05$  by t student test.

All error bars in the figure represent  $\pm$  SEM.



# Supplemental Experimental Procedures

## Measurement of compound concentration

Cultured cells were washed with PBS twice prior to be switched to compound free medium. Two millions of cells were collected from untreated, 1 and 24 hr post compound wash out and stored at -80°C. Calibration standards were prepared at 1, 2, 5, 10, 50, 250, 1000, 2500, 5000, 10000, and 15000 ng/mL in acetonitrile/water (50/50, v/v) from BYL719 primary stock solution (1mg/mL in DMSO). The frozen cell pellet samples were thawed and centrifuged for 10 minutes at 3300rpm. Aliquot 10 µL of matrix and control blank (50:50 Acetonitrile:Water), calibration standard, and cell samples into 96 well plate. 50 µL internal standard (Alprazolam) was added into all samples, except control blank, while 50 µL of acetonitrile was added into the control blank. The 96-well plate was covered and vortexed, then centrifuged for 10 minutes at 3300 rpm. 40 µL of supernatants were transferred into a clean 96-well plate. 40 µL of Milli-Q water was added into all wells. The plate was covered, vortexed again. All samples were subject to LC/MS analysis. Perkin Elmer PE 200 Series Micropumps was used for LC analysis. An 1.50 min gradient was utilized going from 99% of Mobile phase A and 1% Mobile phase B to 5% of Mobile phase A and 95% of Mobile Phase B with a total run time of 3.50 minutes at a flow rate of 0.6 ml/min. Mobile phase A was 0.1% formic acid in water and Mobile phase B was 0.1 % formic acid in acetonitrile. All the chromatographic measurements were performed at room temperature and the autosampler was maintained at 4°C. The quantitation of the samples was achieved against a calibration curve with a linear regression analysis by API4000 LC-MS/MS in positive ion Multiple Reaction Monitoring (MRM) mode.

## Nuclear and cytoplasmic fractionation and proteome profiler human phospho-RTK arrays.

Cells were incubated for 10 min at 4°C in hypotonic buffer (20 mM HEPES at pH 7.6, 20% glycerol, 10 mM NaCl, 1.5 mM MgCl<sub>2</sub>, 0.2 mM EDTA, 0.1% NP-40). Following centrifugation at 5000 rpm for 1 min, supernatants were used for the cytoplasmic fraction. The pelleted nuclei were washed with hypotonic buffer and incubated for 30 min at 4°C in nuclear extraction buffer (hypotonic buffer containing 500 mM NaCl) and cleared by centrifugation at 13500 rpm. The pRTK arrays were performed according to the manufacturer's instruction.
